# Supplementary material
Source: publisher figshare collection journal article supplement (https://tandf.figshare.com/articles/dataset/_/7544885)
Supplement: Supplementary file 2 [file 1]

Archive with 2 entries (2 files):
- uast_a_1559920_sm9435.mp4
- uast_a_1559920_sm9422.pdf
